# Supplementary material
Source: MDPI journal article supplement (https://www.mdpi.com/1424-2818/15/12/1219)

-2S.D.

Mean

+2S.D.

PC1

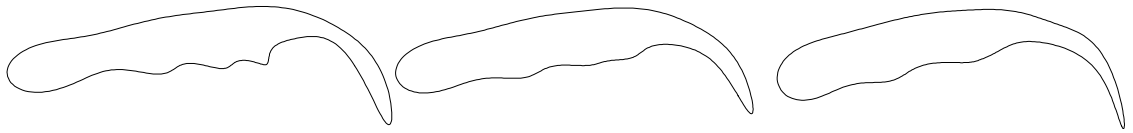

PC2

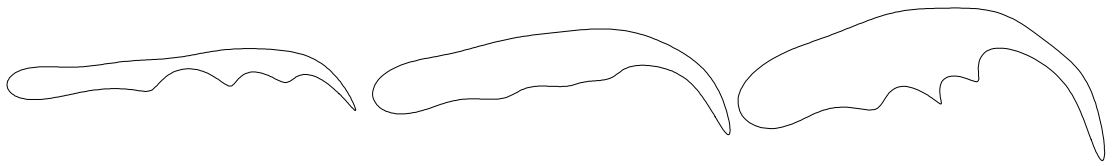

PC3

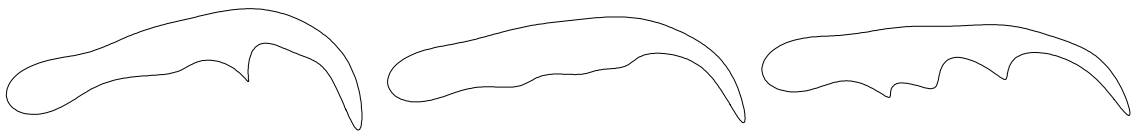

PC4

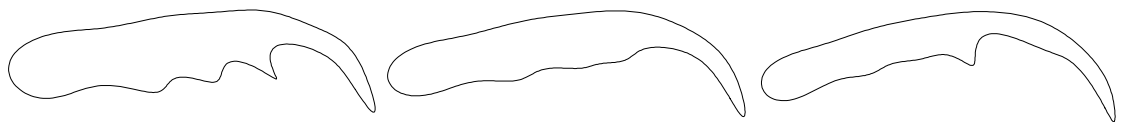

PC5

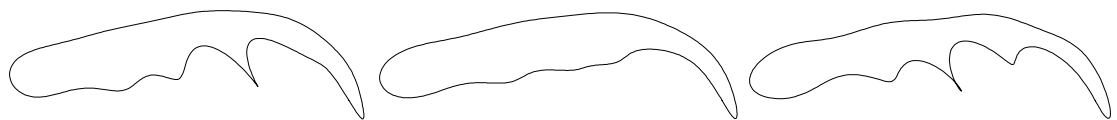

-2S.D.

Mean

+2S.D.

PC6

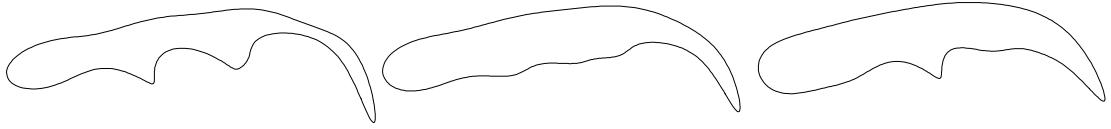

PC7

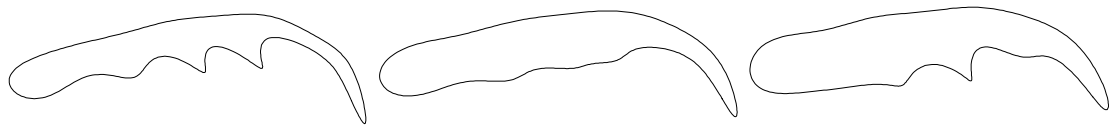

PC8

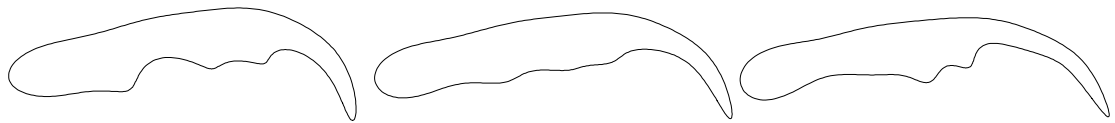

PC9

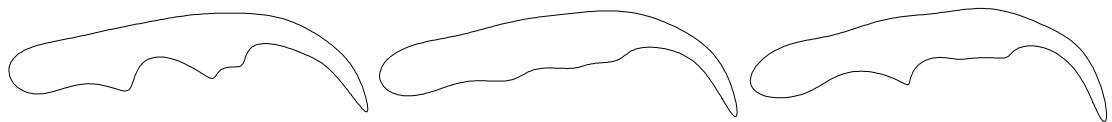

Supplement: s1 [file s1]
